# Supplementary material for: Osteoarthritis-patterns, cardio-metabolic risk factors and risk of all-cause mortality: 20 years follow-up in patients after hip or knee replacement
Source: PubMed Central journal article supplement (PMC5869736; doi:10.1038/s41598-018-23573-2), 2018-03-27
Supplement: 41598_2018_23573_MOESM1_ESM.pdf [file 41598_2018_23573_MOESM1_ESM.pdf]

**Osteoarthritis-patterns, cardio-metabolic risk factors and risk of all-cause mortality: 20 years follow-up in patients after hip or knee replacement.**

Büchele G<sup>1</sup>, Günther KP<sup>2</sup>, Brenner H<sup>3,4</sup>, Puhl W<sup>5</sup>, Stürmer T<sup>6</sup>, Rothenbacher D<sup>1,\*</sup>, Brenner RE<sup>7</sup>

<sup>1</sup> Institute of Epidemiology and Medical Biometry, Ulm University, Helmholtzstraße 22, 89081 Ulm, Germany

<sup>2</sup> University Center of Orthopaedics and Traumatology, University Medicine Carl Gustav Carus Dresden, TU Dresden, Dresden, Germany

<sup>3</sup> Division of Clinical Epidemiology & Aging Research, German Cancer Research Center (DKFZ), Heidelberg, Germany

<sup>4</sup> Network Aging Research, University of Heidelberg, Germany

<sup>5</sup> Department of Orthopedics(emeritus), University of Ulm, Ulm 89081, Germany

<sup>6</sup> Department of Epidemiology, Gillings School of Global Public Health, University of North Carolina at Chapel Hill, Chapel Hill, NC, USA.

<sup>7</sup> Department of Orthopedics, Division for Biochemistry of Joint and Connective Tissue Diseases, University of Ulm, Ulm 89081, Germany.

\*Correspondence to:

Prof. Dr. med. Dietrich Rothenbacher, MPH

Institute of Epidemiology and Medical Biometry, Ulm University, 89081 Ulm Germany

dietrich.rothenbacher@uni-ulm.de

**Supplementary Table S1: Associations with pattern of osteoarthritis (OA)**

|                                            | Bilateral OA<br>(vs. unilateral) |             |         | Generalized OA<br>(vs. not generalized) |             |         | Secondary OA<br>(vs. primary) |             |         |
|--------------------------------------------|----------------------------------|-------------|---------|-----------------------------------------|-------------|---------|-------------------------------|-------------|---------|
|                                            | aOR                              | 95% CI      | p-value | aOR                                     | 95% CI      | p-value | aOR                           | 95% CI      | p-value |
| <b>Model A<sup>&amp;</sup></b>             |                                  |             |         |                                         |             |         |                               |             |         |
| Age (years; per SD)                        | 1.84                             | (1.53-2.21) | <.0001  | 3.07                                    | (2.32-4.07) | <.0001  | 0.58                          | (0.49-0.67) | <.0001  |
| Sex (female vs. male )                     | 1.01                             | (0.66-1.55) | 0.96    | 1.91                                    | (1.25-2.92) | 0.0029  | 0.84                          | (0.62-1.15) | 0.28    |
| Smoking (former vs. non-smoker)            | 0.96                             | (0.60-1.55) | 0.88    | 0.53                                    | (0.34-0.82) | 0.0045  | 1.24                          | (0.89-1.74) | 0.21    |
| Smoking (current vs. non-smoker)           | 1.11                             | (0.60-2.06) | 0.73    | 0.53                                    | (0.25-1.13) | 0.099   | 1.12                          | (0.70-1.80) | 0.64    |
| Localization (hip vs. knee)                | 1.04                             | (0.66-1.64) | 0.86    | 0.71                                    | (0.48-1.04) | 0.077   | 0.98                          | (0.72-1.35) | 0.92    |
| BMI (kg/m <sup>2</sup> ; per SD)           | 1.17                             | (0.94-1.46) | 0.16    | 1.08                                    | (0.89-1.30) | 0.44    | 0.86                          | (0.73-1.00) | 0.051   |
| BMI (25-30 vs <25)                         | 1.11                             | (0.67-1.82) | 0.69    | 1.16                                    | (0.70-1.93) | 0.56    | 0.77                          | (0.53-1.13) | 0.18    |
| BMI (30-35 vs. <25)                        | 1.51                             | (0.81-2.80) | 0.19    | 0.99                                    | (0.57-1.73) | 0.99    | 0.81                          | (0.52-1.25) | 0.34    |
| BMI (>35 vs. <25)                          | 2.69                             | (0.77-9.35) | 0.12    | 1.49                                    | (0.68-3.27) | 0.32    | 0.50                          | (0.24-1.02) | 0.055   |
| History of overweight/obesity (yes vs. no) | 1.56                             | (1.02-2.37) | 0.038   | 1.34                                    | (0.91-1.98) | 0.14    | 0.73                          | (0.54-0.99) | 0.042   |
| Hypercholesterolemia (yes vs. no)          | 0.91                             | (0.57-1.46) | 0.70    | 1.65                                    | (1.10-2.47) | 0.016   | 0.78                          | (0.55-1.10) | 0.15    |

|                                       |      |             |       |      |             |        |      |             |       |
|---------------------------------------|------|-------------|-------|------|-------------|--------|------|-------------|-------|
| Cholesterol (mmol/l; per SD)          | 0.87 | (0.70-1.09) | 0.21  | 1.33 | (1.08-1.64) | 0.0066 | 0.83 | (0.69-1.01) | 0.065 |
| Uric acid (mmol/l; per SD)            | 0.91 | (0.73-1.14) | 0.41  | 1.18 | (0.96-1.46) | 0.12   | 0.97 | (0.82-1.15) | 0.73  |
| hs-CRP (log mg/l; per SD)             | 1.03 | (0.84-1.27) | 0.77  | 1.05 | (0.86-1.29) | 0.60   | 0.99 | (0.84-1.15) | 0.86  |
| Diabetes mellitus type 2 (yes vs. no) | 2.32 | (0.81-6.65) | 0.12  | 1.11 | (0.60-2.06) | 0.74   | 0.63 | (0.36-1.12) | 0.12  |
| Gout (yes vs. no)                     | 1.60 | (0.78-3.29) | 0.20  | 1.71 | (1.01-2.89) | 0.045  | 0.76 | (0.48-1.20) | 0.24  |
| Hypertension (yes vs. no)             | 1.45 | (0.93-2.25) | 0.098 | 1.48 | (1.00-2.18) | 0.047  | 0.84 | (0.61-1.14) | 0.25  |
| Cardiac infarction (yes vs. no)       | 3.91 | (0.52-29.2) | 0.18  | 0.77 | (0.32-1.83) | 0.55   | 0.55 | (0.23-1.28) | 0.17  |
| Cardiac insufficiency (yes vs. no)    | 1.27 | (0.66-2.52) | 0.50  | 1.67 | (1.08-2.60) | 0.023  | 0.79 | (0.52-1.22) | 0.29  |

**Model B\***

|                                  |             |                    |                  |             |                    |                  |             |                    |                  |
|----------------------------------|-------------|--------------------|------------------|-------------|--------------------|------------------|-------------|--------------------|------------------|
| Age (years; per SD)              | <b>1.76</b> | <b>(1.40-2.21)</b> | <b>&lt;.0001</b> | <b>2.67</b> | <b>(1.95-3.65)</b> | <b>&lt;.0001</b> | <b>0.60</b> | <b>(0.50-0.73)</b> | <b>&lt;.0001</b> |
| Sex (female vs. male)            | 0.99        | (0.59-1.67)        | 0.98             | 1.49        | (0.88-2.52)        | 0.14             | 0.89        | (0.61-1.31)        | 0.56             |
| Smoking (former vs. non-smoker)  | 1.00        | (0.59-1.70)        | 0.99             | <b>0.60</b> | <b>(0.36-0.99)</b> | <b>0.047</b>     | 1.23        | (0.84-1.79)        | 0.29             |
| Smoking (current vs. non-smoker) | 1.18        | (0.61-2.29)        | 0.61             | 0.66        | (0.30-1.46)        | 0.30             | 1.08        | (0.65-1.80)        | 0.76             |
| Localization (hip vs. knee)      | 1.16        | (0.72-1.88)        | 0.53             | 0.87        | (0.57-1.32)        | 0.50             | 0.86        | (0.61-1.21)        | 0.38             |

|                                            |             |                    |              |              |                    |              |             |                    |              |
|--------------------------------------------|-------------|--------------------|--------------|--------------|--------------------|--------------|-------------|--------------------|--------------|
| History of overweight/obesity (yes vs. no) | <b>1.53</b> | <b>(0.98-2.40)</b> | <b>0.062</b> | 1.02         | (0.66-1.57)        | 0.93         | 0.78        | (0.56-1.08)        | 0.13         |
| Cholesterol (mmol/l; per SD)               | 0.87        | (0.69-1.09)        | 0.23         | <b>1.27+</b> | <b>(1.02-1.57)</b> | <b>0.029</b> | <b>0.84</b> | <b>(0.56-1.08)</b> | <b>0.087</b> |
| Uric acid (mmol/l; per SD)                 | 0.84        | (0.64-1.09)        | 0.18         | 1.19         | (0.94-1.52)        | 0.15         | 1.00        | (0.82-1.22)        | 0.98         |
| hs-CRP (log mg/l; per SD)                  | 0.98        | (0.79-1.22)        | 0.85         | 1.03         | (0.83-1.28)        | 0.81         | 1.03        | (0.87-1.21)        | 0.76         |
| Diabetes mellitus type 2 (yes vs. no)      | 2.01        | (0.69-5.90)        | 0.20         | 0.97         | (0.49-1.91)        | 0.93         | 0.64        | (0.35-1.15)        | 0.14         |
| Gout (yes vs. no)                          | 1.75        | (0.81-3.78)        | 0.15         | 1.47         | (0.82-2.65)        | 0.20         | 0.78        | (0.48-1.28)        | 0.34         |
| Hypertension (yes vs. no)                  | 1.39        | (0.87-2.22)        | 0.17         | 1.24         | (0.81-1.89)        | 0.32         | 0.96        | (0.69-1.33)        | 0.79         |
| Cardiac infarction (yes vs. no)            | 3.33        | (0.44-25.3)        | 0.25         | 0.83         | (0.33-2.10)        | 0.70         | 0.54        | (0.23-1.31)        | 0.17         |
| Cardiac insufficiency (yes vs. no)         | 1.05        | (0.52-2.16)        | 0.89         | 1.38         | (0.85-2.24)        | 0.20         | 0.93        | (0.59-1.46)        | 0.74         |

aOR adjusted Odds Ratios; CI confidence intervals; SD standard deviation for age 8.75 years, for BMI 4.28 kg/m<sup>2</sup>, for cholesterol 1.09 mmol/l, for uric acid 84.24 mmol/l, for CRP 1.06 log mg/l

**& Model A** shows age adjusted odds ratios with 95% confidence intervals. Italic marked associations revealed p-values below 0.10.

\* **Model B** shows completely and mutually adjusted odds ratios with 95% confidence intervals. Not included in Model B were variables regarding BMI and hypercholesterolemia due to high overlap with other variables. Bold marked associations revealed p-values below 0.10.
